# Supplementary material
Source: PubMed Central journal article supplement (PMC8595752)
Supplement: NIHMS1734619-supplement-Supplemental_Digital_Content_1.pdf [file NIHMS1734619-supplement-Supplemental_Digital_Content_1.pdf]

**Supplemental Digital Content, Table 1.** Investigated Genes with Significant Association to SSNHL

| Gene                       | Polymorphism | # Total Studies | Supporting Studies                           | Non-Supporting Studies                                                                                                    |
|----------------------------|--------------|-----------------|----------------------------------------------|---------------------------------------------------------------------------------------------------------------------------|
| <i>APOE</i> <sup>†</sup>   | -            | 1               | Hamidi 2019                                  |                                                                                                                           |
| <i>ARNTL</i>               | -            | 1               | Yang 2015                                    |                                                                                                                           |
| <i>CFH</i> <sup>*</sup>    | rs1061170    | 1               | Nishio 2012                                  |                                                                                                                           |
| <i>CLOCK</i>               | -            | 1               | Yang 2015                                    |                                                                                                                           |
| <i>CRY1</i>                | -            | 1               | Yang 2015                                    |                                                                                                                           |
| <i>CRY2</i>                | -            | 1               | Yang 2015                                    |                                                                                                                           |
| <i>CSNK1E</i>              | -            | 1               | Yang 2015                                    |                                                                                                                           |
| <i>DNMT1</i> <sup>‡</sup>  | rs2228611    | 1               | Yildiz 2017                                  |                                                                                                                           |
|                            | rs2228612    | 1               |                                              |                                                                                                                           |
| <i>EDNI</i> <sup>*</sup>   | rs5370       | 1               | Uchida 2013                                  |                                                                                                                           |
| <i>FCRL3</i> <sup>‡</sup>  | rs7528684    | 1               | Liu 2015                                     |                                                                                                                           |
|                            | rs3761959    | 1               |                                              |                                                                                                                           |
|                            | rs7522061    | 1               |                                              |                                                                                                                           |
|                            |              |                 |                                              |                                                                                                                           |
| <i>F2</i> <sup>*</sup>     | rs179963     | 12              | Patscheke 2001, Capaccio 2007, Capaccio 2009 | Gorur 2005, Marcucci 2005, Cadoni 2006, Yildiz 2008, Ballesteros 2009, Fusconi 2011, Lan 2011, Mosnier 2011, Tripodi 2014 |
| <i>F5</i> <sup>*</sup>     | rs6025       | 12              | Gorur 2005, Capaccio 2007, Capaccio 2009     | Rudack 2004, Gorur 2005, Marcucci 2005, Cadoni 2006, Yildiz 2008, Ballesteros 2009, Fusconi 2011, Lan 2011, Mosnier 2011  |
| <i>GJB2</i>                | c.109G>A     | 1               | Chen 2016                                    |                                                                                                                           |
| <i>GRHL2</i> <sup>†</sup>  | rs611419     | 1               | Lin 2016                                     |                                                                                                                           |
|                            | rs10955255   | 1               |                                              |                                                                                                                           |
| <i>GSR</i> <sup>*</sup>    | rs2251780    | 1               | Kitoh 2017                                   |                                                                                                                           |
|                            | rs3779647    | 1               |                                              |                                                                                                                           |
| <i>GSTP1</i> <sup>*</sup>  | rs1695       | 1               | Kitoh 2016                                   |                                                                                                                           |
| <i>GPX3</i> <sup>†</sup>   | rs3805435    | 1               | Chien 2017                                   |                                                                                                                           |
| <i>HLA-DRB1</i>            | -            | 3               | Yeo 2000, Amor-Dorado 2005                   | Yeo 2001                                                                                                                  |
| <i>HSPA1A</i> <sup>†</sup> | rs2075800    | 1               | Lin 2016                                     |                                                                                                                           |
| <i>ICAMI</i> <sup>*</sup>  | rs5498       | 1               | Tian 2018                                    |                                                                                                                           |
| <i>IL1A</i> <sup>*</sup>   | rs1800587    | 1               | Furuta 2011                                  |                                                                                                                           |
| <i>IL1B</i> <sup>*</sup>   | rs1143627    | 1               | Um 2013                                      |                                                                                                                           |
|                            | rs16944      | 2               | Um 2013                                      | Furuta 2011                                                                                                               |
| <i>IL4R</i> <sup>*</sup>   | rs180275     | 1               | Nam 2006                                     |                                                                                                                           |
| <i>IL6</i> <sup>*</sup>    | rs1800795    | 1               | Cadoni 2015                                  |                                                                                                                           |
|                            | rs1800796    | 2               | Hiramatsu 2012, Tian 2018                    |                                                                                                                           |
| <i>ITGA2</i> <sup>*</sup>  | rs1126643    | 4               | Rudack 2004, Rudack 2006, Ballesteros 2012   | Weiss 2014                                                                                                                |

|                                   |            |    |                                                                                                                                 |                                                              |
|-----------------------------------|------------|----|---------------------------------------------------------------------------------------------------------------------------------|--------------------------------------------------------------|
| <b><i>ITGB3*</i></b>              | rs5918     | 5  | Capaccio 2007, Capaccio 2009                                                                                                    | Rudack 2004, Ballesteros 2012, Tripodi 2014                  |
| <b><i>LTA</i></b>                 | rs905253   | 1  | Um 2010                                                                                                                         |                                                              |
| <b><i>MIF</i></b>                 | rs755622   | 1  | Yazdani 2015, Zhu 2019                                                                                                          |                                                              |
| <b><i>MMP1*</i></b>               | rs1799750  | 1  | Nam 2011                                                                                                                        |                                                              |
| <b><i>MTHFR*</i></b>              | rs1801133  | 14 | Capaccio 2005, Capaccio 2005, Capaccio 2007, Yildiz 2008, Braverman 2009, Capaccio 2009, Uchida 2010, Fusconi 2011, Hamidi 2019 | Rudack 2004, Cadoni 2006, Gross 2006, Lee 2010, Tripodi 2014 |
|                                   | rs1801131  | 6  | Capaccio 2005, Capaccio 2005, Capaccio 2007, Capaccio 2009,                                                                     | Gross 2006, Tripodi 2014                                     |
| <b><i>MTR</i></b>                 | rs1805087  | 2  | Gross 2006                                                                                                                      | Teranishi 2013                                               |
| <b><i>NOS3*</i></b>               | rs1799983  | 4  | Fatini 2005, Teranishi 2013, Kitoh 2017, Yazdani 2018                                                                           |                                                              |
| <b><i>NR3C1</i></b>               | rs4912910  | 1  | Kitoh 2017                                                                                                                      |                                                              |
| <b><i>PDE4D*</i></b>              | rs702553   | 1  | Chien 2016                                                                                                                      |                                                              |
| <b><i>PER1</i></b>                | -          | 1  | Yang 2015                                                                                                                       |                                                              |
| <b><i>PIK3CD</i></b>              | C896T      | 1  | Zou 2016                                                                                                                        |                                                              |
| <b><i>PRKCH*</i></b>              | rs2230500  | 2  | Uchida 2011, Kitoh 2016                                                                                                         |                                                              |
| <b><i>SERPINE1†</i></b>           | rs1799889  | 3  | Cho 2012                                                                                                                        | Rudack 2004, Yildiz 2008                                     |
| <b><i>SLC40A1*</i></b>            | rs11568351 | 1  | Castiglione 2015                                                                                                                |                                                              |
| <b><i>SOD1*</i></b>               | rs4998557  | 1  | Kitoh 2016                                                                                                                      |                                                              |
| <b><i>TLR2, 3, 4, 7, 8, 9</i></b> | -          | 1  | Yang 2015                                                                                                                       |                                                              |
| <b><i>UCP2*</i></b>               | rs660339   | 1  | Koide 2018                                                                                                                      |                                                              |

\* Denotes genes suggested to have an increased risk of SSNHL

† Denotes genes suggested to have a decreased risk of SSNHL

‡ Denotes genes for which at least one polymorphism was found to have an increased risk of SSNHL while another polymorphism was found to have a decreased risk of SSNHL
