# Supplementary material
Source: PubMed Central journal article supplement (PMC8595752)
Supplement: NIHMS1734619-supplement-Supplemental_Digital_Content_2.pdf [file NIHMS1734619-supplement-Supplemental_Digital_Content_2.pdf]

**Supplemental Digital Content, Table 2.** Investigated Genes with No Significant Association to SSNHL

| Gene            | Polymorphism | # Total Supporting Studies | Previously Reported Significant Association* | Studies                         |
|-----------------|--------------|----------------------------|----------------------------------------------|---------------------------------|
| <i>AQP4</i>     | rs2075575    | 1                          | N                                            | Nishio 2013                     |
| <i>AQP5</i>     | rs3736309    | 1                          | N                                            | Nishio 2013                     |
| <i>CCL2</i>     | -            | 1                          | N                                            | Cadoni 2015                     |
| <i>CYBA</i>     | -            | 1                          | N                                            | Teranishi 2013                  |
| <i>CYP1A1</i>   | -            | 1                          | N                                            | Um 2011                         |
| <i>ESR1</i>     | rs2234693    | 2                          | N                                            | Nishio 2013, Kitoh 2016         |
|                 | rs9340799    | 1                          | N                                            | Nishio 2013                     |
| <i>GJB2</i>     | 235delC      | 2                          | Y                                            | Kokotas 2008, Chen 2016         |
| <i>GRHL2</i>    | rs6989650    | 1                          | Y                                            | Lin 2016                        |
| <i>GPX3</i>     | rs3763013    | 1                          | Y                                            | Chien 2017                      |
|                 | rs8177412    | 1                          | Y                                            | Chien 2017                      |
|                 | rs3828599    | 1                          | Y                                            | Chien 2017                      |
|                 | rs2070593    | 1                          | Y                                            | Chien 2017                      |
| <i>GPX1</i>     | rs7493       | 1                          | N                                            | Teranishi 2012                  |
|                 | rs854560     | 1                          | N                                            | Teranishi 2012                  |
| <i>GSTM1</i>    | -            | 3                          | N                                            | Cadoni 2006, Um 2011, Zong 2019 |
| <i>GSTT1</i>    | -            | 3                          | N                                            | Cadoni 2006, Um 2011, Zong 2019 |
| <i>HAMP</i>     | -            | 1                          | N                                            | Castiglione 2015                |
| <i>HFE</i>      | rs1799945    | 1                          | N                                            | Castiglione 2015                |
|                 | rs1800562    | 1                          | N                                            | Castiglione 2015                |
| <i>HLA-DPB1</i> | -            | 1                          | N                                            | Yeo 2001                        |
| <i>HLA-DQA1</i> | -            | 1                          | N                                            | Yeo 2001                        |
| <i>HLA-DQB1</i> | -            | 1                          | N                                            | Yeo 2001                        |
| <i>HSPA1A</i>   | rs1043618    | 1                          | Y                                            | Chien 2012                      |
| <i>HSPA1L</i>   | -            | 1                          | N                                            | Chien 2012                      |
| <i>IL4R</i>     | rs1801275    | 1                          | Y                                            | Hiramatsu 2012                  |
| <i>IL10</i>     | rs1800872    | 1                          | N                                            | Hiramatsu 2012                  |
| <i>MMP1</i>     | rs494379     | 1                          | Y                                            | Nam 2011                        |
| <i>MT-ND2</i>   | -            | 1                          | N                                            | Teranishi 2013                  |
| <i>MTNR1B</i>   | rs1387153    | 1                          | N                                            | Teranishi 2013                  |
| <i>MT-RNR1</i>  | -            | 1                          | N                                            | Chen 2016                       |
| <i>MTRR</i>     | rs1801394    | 1                          | N                                            | Teranishi 2013                  |
| <i>NOS3</i>     | rs61722009   | 1                          | Y                                            | Fatini 2005                     |
| <i>NR3C2</i>    | rs2070951    | 1                          | N                                            | Kitoh 2016                      |
| <i>PDE4D</i>    | rs966221     | 1                          | Y                                            | Chien 2016                      |
|                 | rs2910829    | 1                          | Y                                            | Chien 2016                      |

|                        |           |   |   |                  |
|------------------------|-----------|---|---|------------------|
| <b><i>PON1</i></b>     | rs662     | 1 | N | Teranishi 2012   |
| <b><i>PON2</i></b>     | rs7493    | 1 | N | Teranishi 2012   |
| <b><i>SOD1</i></b>     | rs1041740 | 1 | Y | Kitoh 2016       |
| <b><i>SELE</i></b>     | -         | 1 | N | Cadoni 2015      |
| <b><i>TF</i></b>       | -         | 1 | N | Castiglione 2015 |
| <b><i>TNF</i></b>      | rs1800795 | 1 | N | Um 2010          |
|                        | rs1800630 | 1 | N | Hiramatsu 2012   |
| <b><i>TNFRSF1B</i></b> | rs1061624 | 1 | N | Hiramatsu 2012   |
| <b><i>VEGFA</i></b>    | rs3025039 | 1 | N | Hiramatsu 2012   |
|                        | rs699947  | 1 | N | Hiramatsu 2012   |
|                        | rs1570360 | 1 | N | Hiramatsu 2012   |
| <b><i>VDR</i></b>      | rs2228570 | 1 | N | Yazdani 2018     |

\*Genes previously reported as having a significant association with SSNHL by other studies in contrast to those listed on this table demonstrating a lack of statistically significant association with SSNHL. Studies for the genes demonstrating a significant association (denoted by “Y”) are listed in Supplemental Table 1.
