# Supplementary material
Source: PubMed Central journal article supplement (PMC8595752)
Supplement: NIHMS1734619-supplement-Supplemental_Digital_Content_3.pdf [file NIHMS1734619-supplement-Supplemental_Digital_Content_3.pdf]

### Supplemental Digital Content, Table 3. Temporal Bone Literature Review Study Features

| Subject                         | Age of Onset (years) | Age of Death (years) | Sex | Ear (Laterality) | Hair Cells* | Supporting Cells* | Tectorial Membrane* | Stria Vascularis* | Spiral Ganglion* | Spiral Limbus* |
|---------------------------------|----------------------|----------------------|-----|------------------|-------------|-------------------|---------------------|-------------------|------------------|----------------|
| <b>Merchant et al. (2005)</b>   |                      |                      |     |                  |             |                   |                     |                   |                  |                |
| 1                               | 63                   | 67                   | M   | L                | 1           | 1                 | 0                   | 1                 | 0                | 0              |
| 2                               | 57                   | 57                   | M   | R                | 1           | 1                 | 1                   | 1                 | 0                | 1              |
| 3                               | 39                   | 59                   | F   | R                | 0           | 1                 | 1                   | 0                 | 0                | 0              |
| 4                               | 65                   | 85                   | F   | R                | 1           | 1                 | 0                   | 0                 | 0                | 0              |
| 5                               | 43                   | 45                   | F   | L                | 1           | 1                 | 0                   | 0                 | 0                | 0              |
| 6                               | 63                   | 64                   | M   | R                | 1           | 1                 | 0                   | 0                 | 0                | 0              |
| 7                               | 52                   | 85                   | F   | L                | 1           | 1                 | 0                   | 1                 | 1                | 1              |
| 8                               | 68                   | 87                   | M   | L                | 1           | 1                 | 1                   | 1                 | 1                | 1              |
| 9                               | 63                   | 67                   | M   | R                | 0           | 0                 | 0                   | 0                 | 1                | 0              |
| 10                              | 43                   | 48                   | F   | L                | 1           | 1                 | 0                   | 0                 | 0                | 0              |
| 11                              | 25                   | 47                   | M   | L                | 1           | 1                 | 1                   | 1                 | 1                | 1              |
| 12                              | 46                   | 46                   | M   | R                | 0           | 0                 | 0                   | 0                 | 0                | 0              |
| 13                              | 40                   | 83                   | F   | R                | 1           | 1                 | 0                   | 1                 | 1                | 1              |
| 14                              | 10                   | 94                   | F   | R                | 1           | 1                 | 0                   | 1                 | 1                | 1              |
| 15                              | 65                   | 94                   | F   | L                | 1           | 1                 | 0                   | 1                 | 0                | 0              |
| 16                              | 78                   | 80                   | M   | R                | 0           | 0                 | 0                   | 0                 | 0                | 0              |
| 17                              | 78                   | 80                   | M   | L                | 1           | 1                 | 0                   | 1                 | 1                | 0              |
| <b>Schuknecht et al. (1986)</b> |                      |                      |     |                  |             |                   |                     |                   |                  |                |
| 18                              | 63                   | 67                   | M   | L                | 1           | 1                 | 0                   | 1                 | 0                |                |
| 19                              | 57                   | 57                   | M   | R                | 0           | 0                 | 1                   | 1                 | 0                |                |
| 20                              | 39                   | 59                   | F   | R                | 0           | 1                 | 1                   | 1                 | 0                |                |
| 21                              | 65                   | 85                   | F   | R                | 1           | 1                 | 0                   | 0                 | 0                |                |
| 22                              | 43                   | 44                   | F   | L                | 1           | 1                 | 0                   | 0                 | 0                |                |
| 23                              | 63                   | 64                   | M   | R                | 1           | 1                 | 0                   | 0                 | 0                |                |
| 24                              | 52                   | 85                   | F   | L                | 1           | 1                 | 0                   | 1                 | 1                |                |
| 25                              | 68                   | 87                   | M   | L                | 1           | 1                 | 1                   | 1                 | 0                |                |
| 26                              | 63                   | 67                   | M   | R                | 0           | 0                 | 0                   | 0                 | 1                |                |
| 27                              | 43                   | 48                   | F   | L                | 1           | 1                 | 0                   | 0                 | 0                |                |
| 28                              | 25                   | 47                   | M   | L                | 1           | 1                 | 1                   | 1                 | 1                |                |
| 29                              | 46                   | 46                   | M   | R                | 0           | 0                 | 0                   | 0                 | 0                |                |
| <b>Yoon et al. (1990)</b>       |                      |                      |     |                  |             |                   |                     |                   |                  |                |
| 30a**                           | 7                    | 20                   | M   | R                | 1           |                   | 0                   | 0                 | 1                |                |
| 30b**                           | 7                    | 20                   | M   | L                | 0           |                   | 0                   | 0                 | 1                |                |
| 31                              | 6                    | 71                   | M   | L                | 1           |                   | 1                   | 1                 | 1                |                |
| 32                              | 41                   | 51                   | F   | R                | 1           |                   | 1                   | 0                 | 1                |                |
| 33a**                           | 40                   | 72                   | M   | R                | 1           |                   | 0                   | 1                 | 1                |                |
| 33b**                           | 40                   | 72                   | M   | L                | 1           |                   | 0                   | 0                 | 1                |                |
| 34                              | 51                   | 66                   | M   | R                | 1           |                   | 0                   | 1                 | 1                |                |
| 35a**                           | 16                   | 29                   | M   | R                | 0           |                   | 0                   | 1                 | 1                |                |
| 35b**                           | 16                   | 29                   | M   | L                | 1           |                   | 1                   | 1                 | 1                |                |
| 36                              | 54                   | 54                   | M   | R                | 1           |                   | 1                   | 1                 | 1                |                |
| 37                              | 14                   | 22                   | F   | R                | 1           |                   | 1                   | 1                 | 1                |                |
| <b>Vasama et al. (2000)</b>     |                      |                      |     |                  |             |                   |                     |                   |                  |                |
| 38                              | 79                   |                      | F   |                  | 1           |                   |                     | 1                 | 0                | 0              |
| 39                              | 77                   |                      | F   |                  | 1           |                   |                     | 1                 | 0                | 0              |
| 40                              | 61                   |                      | F   |                  | 1           |                   |                     | 1                 | 1                | 0              |
| 41                              | 76                   |                      | F   |                  | 1           |                   |                     | 1                 | 1                | 0              |
| 42                              | 75                   |                      | F   |                  | 1           |                   |                     | 1                 | 1                | 0              |
| 43                              | 94                   |                      | F   |                  | 1           |                   |                     | 1                 | 1                | 1              |
| 44                              | 65                   |                      | F   |                  | 1           |                   |                     | 1                 | 1                | 0              |
| 45                              | 77                   |                      | M   |                  | 1           |                   |                     | 1                 | 1                | 0              |
| 46                              | 71                   |                      | M   |                  | 1           |                   |                     | 1                 | 0                | 0              |
| 47                              | 95                   |                      | M   |                  | 1           |                   |                     | 1                 | 1                | 0              |
| 48                              | 42                   |                      | M   |                  | 1           |                   |                     | 1                 | 1                | 1              |
| 49                              | 75                   |                      | M   |                  | 1           |                   |                     | 1                 | 1                | 0              |
| <b>Khetarpal et al. (1990)</b>  |                      |                      |     |                  |             |                   |                     |                   |                  |                |
| 50                              | 52                   | 64                   | M   |                  | 1           | 1                 | 1                   | 1                 | 1                | 1              |
| 51                              | 52                   | 64                   | M   |                  | 1           | 1                 | 1                   | 1                 | 0                | 1              |
| 52                              | 52                   | 64                   | M   |                  | 1           | 1                 | 1                   | 1                 | 0                | 1              |
| 53                              | 52                   | 64                   | M   |                  | 1           | 1                 | 1                   | 1                 | 0                | 1              |
| 54                              | 52                   | 64                   | M   |                  | 1           | 1                 | 1                   | 1                 | 1                | 1              |
| 55                              | 52                   | 64                   | M   |                  | 1           | 1                 | 1                   | 1                 | 0                | 1              |
| 56                              | 49                   | 60                   | M   |                  | 1           | 1                 | 1                   | 1                 | 1                | 1              |
| 57                              | 49                   | 60                   | M   |                  | 1           | 1                 | 1                   | 1                 | 0                | 1              |
| 58                              | 49                   | 60                   | M   |                  | 1           | 1                 | 0                   | 1                 | 0                | 0              |
| 59                              | 49                   | 60                   | M   |                  | 1           | 1                 | 1                   | 1                 | 0                | 1              |
| 60                              | 49                   | 60                   | M   |                  | 1           | 1                 | 1                   | 1                 | 0                | 0              |
| 61                              | 49                   | 60                   | M   |                  | 1           | 1                 | 1                   | 1                 | 0                | 0              |
| 62                              | 13                   | 49                   | M   |                  | 1           | 1                 | 1                   | 1                 | 1                | 1              |
| 63                              | 13                   | 49                   | M   |                  | 1           | 1                 | 1                   | 1                 | 1                | 1              |
| 64                              | 13                   | 49                   | M   |                  | 1           | 1                 | 1                   | 1                 | 1                | 1              |
| 65                              | 13                   | 49                   | M   |                  | 1           | 1                 | 1                   | 1                 | 1                | 1              |
| 66                              | 13                   | 49                   | M   |                  | 1           | 1                 | 1                   | 1                 | 1                | 1              |
| 67                              | 13                   | 49                   | M   |                  | 1           | 1                 | 1                   | 1                 | 1                | 1              |
| <b>Bahmad (2003)</b>            |                      |                      |     |                  |             |                   |                     |                   |                  |                |
| 68                              | 40                   | 62                   | M   | L                | 1           |                   | 0                   | 1                 | 1                |                |

\*Cell types denoted "1" or "0" with "1" signifying abnormal findings on histopathology

\*\*Patients with bilateral hearing loss with each ear included individually, denoted with "a" and "b"
