# Supplementary material
Source: PubMed Central journal article supplement (PMC8595752)
Supplement: NIHMS1734619-supplement-Supplemental_Digital_Content_4.pdf [file NIHMS1734619-supplement-Supplemental_Digital_Content_4.pdf]

**Supplemental Digital Content, Table 4A.** Risk of Bias Assessmnt for Case Control Studies Utilizing the Newcastle Ottawa Scale (NOS)

| Study              | <u>SELECTION</u>            |                             |                       |                        | <u>COMPARABILITY</u>                                               | <u>EXPOSURE</u>           |                                                |                   | Total Score |
|--------------------|-----------------------------|-----------------------------|-----------------------|------------------------|--------------------------------------------------------------------|---------------------------|------------------------------------------------|-------------------|-------------|
|                    | Adequacy of Case Definition | Representativeness of Cases | Selection of Controls | Definition of Controls | Comparability of Cases and Controls on Basis of Design or Analysis | Ascertainment of Exposure | Same Ascertainment Method for Cases & Controls | Non-Response Rate |             |
| Amor-Dorado J 2005 | 1                           | 1                           | 1                     | 1                      | 1                                                                  | 1                         | 0                                              | 1                 | 7           |
| Ballesteros F 2012 | 1                           | 1                           | 0                     | 1                      | 2                                                                  | 1                         | 1                                              | 1                 | 8           |
| Ballesteros F 2012 | 1                           | 1                           | 1                     | 1                      | 2                                                                  | 1                         | 0                                              | 1                 | 8           |
| Cadoni G 2006      | 1                           | 1                           | 1                     | 1                      | 2                                                                  | 1                         | 1                                              | 1                 | 9           |
| Cadoni G 2006      | 1                           | 1                           | 1                     | 1                      | 2                                                                  | 1                         | 1                                              | 1                 | 9           |
| Cadoni G 2015      | 1                           | 1                           | 1                     | 1                      | 2                                                                  | 1                         | 1                                              | 1                 | 9           |
| Capaccio P 2005    | 1                           | 1                           | 1                     | 1                      | 2                                                                  | 1                         | 1                                              | 1                 | 9           |
| Capaccio P 2005    | 1                           | 1                           | 1                     | 1                      | 2                                                                  | 1                         | 1                                              | 1                 | 9           |
| Capaccio P 2007    | 1                           | 1                           | 1                     | 1                      | 2                                                                  | 1                         | 1                                              | 1                 | 9           |
| Castiglione A 2015 | 1                           | 1                           | 1                     | 1                      | 2                                                                  | 1                         | 1                                              | 1                 | 9           |
| Chen K 2016        | 1                           | 1                           | 1                     | 1                      | 1                                                                  | 1                         | 1                                              | 1                 | 8           |
| Chien C 2017       | 1                           | 1                           | 1                     | 1                      | 1                                                                  | 1                         | 1                                              | 1                 | 8           |
| Chien CY 2012      | 1                           | 1                           | 1                     | 1                      | 1                                                                  | 1                         | 1                                              | 1                 | 8           |
| Chien CY 2016      | 1                           | 1                           | 1                     | 1                      | 1                                                                  | 1                         | 1                                              | 1                 | 8           |
| Cho SH 2012        | 1                           | 1                           | 1                     | 1                      | 2                                                                  | 1                         | 1                                              | 1                 | 9           |
| Fatini C 2005      | 1                           | 1                           | 1                     | 1                      | 2                                                                  | 1                         | 1                                              | 1                 | 9           |
| Furuta T 2011      | 1                           | 1                           | 1                     | 1                      | 2                                                                  | 1                         | 1                                              | 1                 | 9           |
| Fusconi M 2011     | 1                           | 1                           | 0                     | 1                      | 2                                                                  | 1                         | 1                                              | 1                 | 8           |
| Gorur K 2005       | 1                           | 1                           | 0                     | 1                      | 2                                                                  | 1                         | 1                                              | 1                 | 8           |
| Gross M 2006       | 1                           | 1                           | 1                     | 1                      | 2                                                                  | 1                         | 1                                              | 1                 | 9           |
| Hamidi A 2019      | 1                           | 1                           | 1                     | 1                      | 2                                                                  | 1                         | 1                                              | 1                 | 9           |
| Hiramatsu M 2012   | 1                           | 1                           | 1                     | 1                      | 2                                                                  | 1                         | 1                                              | 1                 | 9           |
| Kitoh R 2016       | 1                           | 1                           | 1                     | 1                      | 1                                                                  | 1                         | 1                                              | 1                 | 8           |
| Kitoh R 2017       | 1                           | 1                           | 0                     | 0                      | 1                                                                  | 1                         | 1                                              | 1                 | 6           |
| Koide Y 2018       | 1                           | 1                           | 1                     | 1                      | 2                                                                  | 1                         | 1                                              | 1                 | 9           |
| Lan MY 2011        | 1                           | 1                           | 1                     | 1                      | 1                                                                  | 1                         | 1                                              | 1                 | 8           |
| Lee EJ 2010        | 1                           | 1                           | 1                     | 1                      | 2                                                                  | 1                         | 1                                              | 1                 | 9           |

**Supplemental Digital Content, Table 4A.** Risk of Bias Assessment for Case Control Studies Utilizing the Newcastle Ottawa Scale (NOS)

|                     |   |   |   |   |   |   |   |   |          |
|---------------------|---|---|---|---|---|---|---|---|----------|
| Lin X 2016          | 1 | 1 | 1 | 1 | 2 | 1 | 1 | 1 | <b>9</b> |
| Liu H 2015          | 1 | 1 | 1 | 1 | 2 | 1 | 1 | 1 | <b>9</b> |
| Marcucci R 2005     | 1 | 1 | 1 | 1 | 2 | 1 | 1 | 1 | <b>9</b> |
| Mosnier I 2011      | 1 | 1 | 1 | 1 | 2 | 1 | 1 | 1 | <b>9</b> |
| Nam S 2006          | 1 | 1 | 1 | 1 | 2 | 1 | 1 | 1 | <b>9</b> |
| Nam S 2011          | 1 | 1 | 1 | 1 | 2 | 1 | 1 | 1 | <b>9</b> |
| Nishio N 2012       | 1 | 1 | 1 | 1 | 2 | 1 | 1 | 1 | <b>9</b> |
| Nishio N 2013       | 1 | 1 | 1 | 1 | 2 | 1 | 1 | 1 | <b>9</b> |
| Patscheke JH 2001   | 1 | 1 | 1 | 1 | 2 | 1 | 1 | 1 | <b>9</b> |
| Rudack C 2004       | 1 | 1 | 1 | 1 | 2 | 1 | 1 | 1 | <b>9</b> |
| Rudack C 2006       | 1 | 1 | 1 | 1 | 2 | 1 | 1 | 1 | <b>9</b> |
| Seker Yildiz K 2012 | 1 | 1 | 1 | 1 | 2 | 1 | 1 | 1 | <b>9</b> |
| Teranishi M 2012    | 1 | 1 | 1 | 1 | 2 | 1 | 1 | 1 | <b>9</b> |
| Teranishi M 2013    | 1 | 1 | 1 | 1 | 2 | 1 | 1 | 1 | <b>9</b> |
| Tian G 2018         | 1 | 1 | 1 | 1 | 2 | 1 | 1 | 1 | <b>9</b> |
| Tripodi A 2014      | 1 | 1 | 1 | 1 | 2 | 1 | 1 | 1 | <b>9</b> |
| Uchida Y 2010       | 0 | 1 | 1 | 1 | 2 | 1 | 1 | 1 | <b>8</b> |
| Uchida Y 2011       | 0 | 1 | 1 | 1 | 2 | 1 | 1 | 1 | <b>8</b> |
| Uchida Y 2013       | 1 | 1 | 1 | 1 | 2 | 1 | 1 | 1 | <b>9</b> |
| Um JY 2010          | 1 | 1 | 1 | 1 | 2 | 1 | 1 | 1 | <b>9</b> |
| Um JY 2011          | 1 | 1 | 0 | 1 | 2 | 1 | 1 | 1 | <b>8</b> |
| Um JY 2013          | 1 | 1 | 1 | 1 | 2 | 1 | 1 | 1 | <b>9</b> |
| Weiss D 2014        | 1 | 1 | 1 | 1 | 2 | 1 | 1 | 1 | <b>9</b> |
| Yang CH 2015        | 1 | 1 | 1 | 1 | 2 | 1 | 1 | 1 | <b>9</b> |
| Yang CH 2015        | 1 | 1 | 1 | 1 | 2 | 1 | 1 | 1 | <b>9</b> |
| Yazdani N 2015      | 1 | 1 | 1 | 1 | 2 | 1 | 1 | 1 | <b>9</b> |
| Yazdani N 2018      | 1 | 1 | 1 | 1 | 2 | 1 | 1 | 1 | <b>9</b> |
| Yeo SW 2000         | 1 | 1 | 1 | 1 | 2 | 1 | 1 | 1 | <b>9</b> |
| Yeo SW 2001         | 1 | 1 | 1 | 1 | 2 | 1 | 1 | 1 | <b>9</b> |
| Yildiz Z 2008       | 0 | 1 | 1 | 1 | 2 | 1 | 1 | 1 | <b>8</b> |
| Zhu WY 2019         | 1 | 1 | 1 | 1 | 2 | 1 | 1 | 1 | <b>9</b> |

**Supplemental Digital Content, Table 4B.** Risk of Bias Assessment for Cross-Sectional Studies and Case Reports Utilizing the Joanna Briggs Institute Appraisal Methodology.

| Study          | Design          | Qs #1 | Qs #2 | Qs #3 | Qs #4 | Qs #5 | Qs #6 | Qs #7 | Qs #8 |
|----------------|-----------------|-------|-------|-------|-------|-------|-------|-------|-------|
| Capaccio 2009  | Cross-sectional | Y     | Y     | Y     | Y     | Y     | Y     | Y     | Y     |
| Bravenman 2009 | Case report     | Y     | Y     | Y     | Y     | Y     | Y     | N/A   | Y     |
| Kokotas 2008   | Case report     | Y     | Y     | Y     | Y     | Y     | Y     | N/A   | Y     |
| Varga 2019     | Case report     | Y     | Y     | Y     | Y     | Y     | Y     | N/A   | Y     |
| Zou 2016       | Case report     | Y     | Y     | Y     | Y     | Y     | Y     | N/A   | Y     |

**JBI Checklist for Cross-Sectional Studies**

|                                                                             | Yes                      | No                       | Unclear                  | Not applicable           |
|-----------------------------------------------------------------------------|--------------------------|--------------------------|--------------------------|--------------------------|
| 1. Were the criteria for inclusion in the sample clearly defined?           | <input type="checkbox"/> | <input type="checkbox"/> | <input type="checkbox"/> | <input type="checkbox"/> |
| 2. Were the study subjects and the setting described in detail?             | <input type="checkbox"/> | <input type="checkbox"/> | <input type="checkbox"/> | <input type="checkbox"/> |
| 3. Was the exposure measured in a valid and reliable way?                   | <input type="checkbox"/> | <input type="checkbox"/> | <input type="checkbox"/> | <input type="checkbox"/> |
| 4. Were objective, standard criteria used for measurement of the condition? | <input type="checkbox"/> | <input type="checkbox"/> | <input type="checkbox"/> | <input type="checkbox"/> |
| 5. Were confounding factors identified?                                     | <input type="checkbox"/> | <input type="checkbox"/> | <input type="checkbox"/> | <input type="checkbox"/> |
| 6. Were strategies to deal with confounding factors stated?                 | <input type="checkbox"/> | <input type="checkbox"/> | <input type="checkbox"/> | <input type="checkbox"/> |
| 7. Were the outcomes measured in a valid and reliable way?                  | <input type="checkbox"/> | <input type="checkbox"/> | <input type="checkbox"/> | <input type="checkbox"/> |
| 8. Was appropriate statistical analysis used?                               | <input type="checkbox"/> | <input type="checkbox"/> | <input type="checkbox"/> | <input type="checkbox"/> |

**JBI Checklist for Case Reports**

|                                                                                         | Yes                      | No                       | Unclear                  | Not applicable           |
|-----------------------------------------------------------------------------------------|--------------------------|--------------------------|--------------------------|--------------------------|
| 1. Were patient’s demographic characteristics clearly described?                        | <input type="checkbox"/> | <input type="checkbox"/> | <input type="checkbox"/> | <input type="checkbox"/> |
| 2. Was the patient’s history clearly described and presented as a timeline?             | <input type="checkbox"/> | <input type="checkbox"/> | <input type="checkbox"/> | <input type="checkbox"/> |
| 3. Was the current clinical condition of the patient on presentation clearly described? | <input type="checkbox"/> | <input type="checkbox"/> | <input type="checkbox"/> | <input type="checkbox"/> |
| 4. Were diagnostic tests or assessment methods and the results clearly described?       | <input type="checkbox"/> | <input type="checkbox"/> | <input type="checkbox"/> | <input type="checkbox"/> |
| 5. Was the intervention(s) or treatment procedure(s) clearly described?                 | <input type="checkbox"/> | <input type="checkbox"/> | <input type="checkbox"/> | <input type="checkbox"/> |
| 6. Was the post-intervention clinical condition clearly described?                      | <input type="checkbox"/> | <input type="checkbox"/> | <input type="checkbox"/> | <input type="checkbox"/> |
| 7. Were adverse events (harms) or unanticipated events identified and described?        | <input type="checkbox"/> | <input type="checkbox"/> | <input type="checkbox"/> | <input type="checkbox"/> |
| 8. Does the case report provide takeaway lessons?                                       | <input type="checkbox"/> | <input type="checkbox"/> | <input type="checkbox"/> | <input type="checkbox"/> |

Moola S, Munn Z, Tufanaru C, Aromataris E, Sfetcu R, Currie M, Qureshi R, Mattis P, Lisy K, Mu P-F. Chapter 7: Systematic reviews of etiology and risk . In: Aromataris E, Munn Z (Editors). Joanna Briggs Institute Reviewer’s Manual. The Joanna Briggs Institute, 2017. Available from <https://reviewersmanual.joannabriggs.org/>

Moola S, Munn Z, Tufanaru C, Aromataris E, Sears K, Sfetcu R, Currie M, Qureshi R, Mattis P, Lisy K, Mu P-F. Chapter 7: Systematic reviews of etiology and risk . In: Aromataris E, Munn Z (Editors). Joanna Briggs Institute Reviewer’s Manual. The Joanna Briggs Institute, 2017. Available from <https://reviewersmanual.joannabriggs.org/>
