# Supplementary material
Source: PubMed Central journal article supplement (PMC8595752)
Supplement: NIHMS1734619-supplement-Supplemental_Digital_Content_5.pdf [file NIHMS1734619-supplement-Supplemental_Digital_Content_5.pdf]

**Supplemental Digital Content, Table 5.** SSNHL Gene Literature Review Study Features

| <b>First Author</b> | <b>Year</b> | <b>Study Design</b> | <b>Population</b> | <b># SSNHL Subjects</b> | <b>Males</b> | <b>Females</b> | <b>Mean Age ± SD</b> | <b>Investigated Genes</b>     |
|---------------------|-------------|---------------------|-------------------|-------------------------|--------------|----------------|----------------------|-------------------------------|
| Amor-Dorado J       | 2005        | Case control        | Spanish           | 33                      | 14           | 19             | 50 ± 19              | <i>HLA-DRB1, HLA-DQB1</i>     |
| Ballesteros F       | 2012        | Case control        | Spanish           | 118                     | 63           | 55             | 52 ± 14              | <i>ITGA2, ITGB3</i>           |
| Ballesteros F       | 2009        | Case control        | German            | 99                      | 50           | 49             | 51.69 ± 16.4         | <i>F2, F5</i>                 |
| Braverman           | 2009        | Case report         | Israeli           | 1                       | 0            | 1              | 53                   | <i>MTHFR</i>                  |
| Cadoni G            | 2006        | Case control        | Italian           | 48                      | 28           | 20             | 48                   | <i>F2, F5, MTHFR</i>          |
| Cadoni G            | 2015        | Case control        | Italian           | 87                      | 39           | 48             | 50.3 ± 14.8          | <i>IL6, CCL2, SELE</i>        |
| Cadoni G            | 2006        | Case control        | Italian           | 80                      | 41           | 39             | 50.5                 | <i>GSTM1, GSTT1</i>           |
| Capaccio P          | 2009        | Cross-sectional     | Italian           | 10                      | 4            | 6              | 57.3 ± 9.1           | <i>F2, F5, MTHFR, ITGB3</i>   |
| Capaccio P          | 2005        | Case control        | Italian           | 67                      | 40           | 27             | 53.6 ± 11.3          | <i>MTHFR</i>                  |
| Capaccio P          | 2005        | Case control        | Italian           | 45                      | 21           | 24             | 48.5 ± 14.9          | <i>MTHFR</i>                  |
| Capaccio P          | 2007        | Case control        | Italian           | 100                     | 56           | 44             | 48.12 ± 14.6         | <i>F2, F5, MTHFR, ITGB3</i>   |
| Castiglione A       | 2015        | Case control        | Italian           | 200                     | 96           | 104            | 63.65                | <i>SLC40A1, TF, HFE, HAMP</i> |
| Chen K              | 2016        | Case control        | Chinese           | 50                      | 24           | 26             | 44.7 ± 14.5          | <i>GJB2, MT-RNR1</i>          |
| Chien C             | 2017        | Case control        | Taiwanese         | 416                     | 218          | 198            | 50.7 ± 14.8          | <i>GPX3</i>                   |
| Chien CY            | 2016        | Case control        | Taiwanese         | 362                     | 187          | 175            | 51.1 ± 14.6          | <i>PDE4D</i>                  |
| Chien CY            | 2012        | Case control        | Taiwanese         | 160                     | 86           | 74             | 51.6 ± 15.0          | <i>HSPA1A, HSPA1L</i>         |
| Cho SH              | 2012        | Case control        | Italian           | 103                     | 49           | 54             | 54.9                 | <i>SERPINE1</i>               |
| Fatini C            | 2005        | Case control        | Italian           | 80                      | 41           | 39             | 44                   | <i>NOS3</i>                   |
| Furuta T            | 2011        | Case control        | Japanese          | 72                      | 36           | 36             | 58.3 ± 14.0          | <i>IL1A, IL1B</i>             |
| Fusconi M           | 2011        | Case control        | Italian           | 40                      | 17           | 23             | 52.28 ± 15.0         | <i>F2, F5, MTHFR</i>          |
| Gorur K             | 2005        | Case control        | Turkish           | 56                      | 27           | 29             | 42.6 ± 18.2          | <i>F2, F5</i>                 |

|                |      |              |           |     |     |     |               |                                              |
|----------------|------|--------------|-----------|-----|-----|-----|---------------|----------------------------------------------|
| Gross M        | 2006 | Case control | Israeli   | 81  | 41  | 40  | 53.0 ± 13.0   | <i>MTR, MTHFR</i>                            |
| Hamidi A       | 2019 | Case control | Iranian   | 77  | 45  | 32  | 43.5 ± 14.7   | <i>MTHFR, APOE</i>                           |
| Hiramatsu M    | 2012 | Case control | Japanese  | 72  | 36  | 36  | 58.2 ± 1.3    | <i>IL6, IL4R, TNF, VEGFA</i>                 |
| Kitoh R        | 2016 | Case control | Japanese  | 192 | 94  | 98  | 56.4 ± 14.4   | <i>SOD1, GSTP1, PRKCH</i>                    |
| Kitoh R        | 2017 | Case control | Japanese  | 192 | 89  | 103 | 56.4 ± 14.3   | <i>GSR, NOS3, NR3C1</i>                      |
| Koide Y        | 2018 | Case control | Japanese  | 83  | 39  | 44  | 58.0 ± 14.2   | <i>UCP2</i>                                  |
| Kokotas        | 2008 | Case report  | Greek     | 1   | 1   | 0   | 23            | <i>GJB2</i>                                  |
| Lan MY         | 2011 | Case control | Taiwanese | 24  | 13  | 11  | 45            | <i>F2, F5</i>                                |
| Lee EJ         | 2010 | Case control | Korean    | 33  | 17  | 16  | 48.24 ± 14.5  | <i>MTHFR</i>                                 |
| Lin X          | 2016 | Case control | Chinese   | 190 | 108 | 82  | 38.5 ± 4.8    | <i>GRHL2</i>                                 |
| Liu H          | 2015 | Case control | Chinese   | 630 | 336 | 294 | 46.5 ± 6.8    | <i>FCRL3</i>                                 |
| Marcucci R     | 2005 | Case control | Italian   | 155 | 67  | 88  | 54            | <i>F2, F5</i>                                |
| Mosnier I      | 2011 | Case control | French    | 95  | 42  | 53  | 50.1 ± 2.81   | <i>F2, F5</i>                                |
| Nam S          | 2011 | Case control | Korean    | 99  | 45  | 54  | 51.37 ± 17.54 | <i>MMP1</i>                                  |
| Nam S          | 2006 | Case control | Korean    | 97  | 43  | 54  | NR            | <i>IL4R</i>                                  |
| Nishio N       | 2013 | Case control | Japanese  | 86  | 32  | 54  | 54.4 ± 15.3   | <i>AQP4, AQP5, ESRI</i>                      |
| Nishio N       | 2012 | Case control | Japanese  | 72  | 36  | 36  | 58.3 ± 14     | <i>CFH</i>                                   |
| Patscheke JH   | 2001 | Case control | German    | 118 | 68  | 50  | 45.5          | <i>F2</i>                                    |
| Rudack C       | 2006 | Case control | German    | 142 | 77  | 65  | 51.2 ± 17.2   | <i>ITGA2</i>                                 |
| Rudack C       | 2004 | Case control | German    | 85  | 43  | 42  | 52.1          | <i>ITGA2, F2, F5, ITGB3, SERPINE1, MTHFR</i> |
| Seker Yildiz K | 2017 | Case control | Turkish   | 90  | 53  | 37  | 44.6 ± 12.07  | <i>DNMT1</i>                                 |
| Teranishi M    | 2013 | Case control | Japanese  | 83  | 39  | 44  | 58.0 ± 14.2   | <i>NOS3, MTR, MTRR, MTNR1B, CYBA, MT-ND2</i> |
| Teranishi M    | 2012 | Case control | Japanese  | 84  | 38  | 46  | 58.2 ± 14.3   | <i>GPX1, PON1, PON2, SOD2</i>                |
| Tian G         | 2018 | Case control | Chinese   | 75  | 39  | 36  | 50.7 ± 16.7   | <i>IL6, ICAM1</i>                            |

|           |      |              |           |     |    |    |               |                                               |
|-----------|------|--------------|-----------|-----|----|----|---------------|-----------------------------------------------|
| Tripodi A | 2014 | Case control | Italian   | 41  | 26 | 15 | 44            | <i>F2, F5, MTHFR, ITGB3</i>                   |
| Uchida Y  | 2010 | Case control | Japanese  | 33  | 19 | 14 | 61.6 ± 1.6    | <i>MTHFR</i>                                  |
| Uchida Y  | 2013 | Case control | Japanese  | 72  | 36 | 36 | 58.3 ± 14.0   | <i>EDN1</i>                                   |
| Uchida Y  | 2011 | Case control | Japanese  | 33  | 19 | 14 | 61.6 ± 9.3    | <i>PRKCH</i>                                  |
| Um JY     | 2010 | Case control | Korean    | 97  | 63 | 34 | 48.3 ± 17.2   | <i>TNF, LTA</i>                               |
| Um JY     | 2013 | Case control | Korean    | 102 | 66 | 36 | 48.74 ± 17.21 | <i>IL1B</i>                                   |
| Um JY     | 2011 | Case control | Korean    | 98  | 63 | 35 | 48.3 ± 17.2   | <i>CYP1A1, GSTM1, GSTT1</i>                   |
| Varga L   | 2019 | Case report  | Slovakia  | 1   | 0  | 1  | 10            | <i>GJB2</i>                                   |
| Weiss D   | 2014 | Case control | German    | 127 | 65 | 62 | 53.3 ± 17.1   | <i>ITGA2</i>                                  |
| Yang CH   | 2015 | Case control | Taiwanese | 38  | 21 | 17 | 51.39 ± 18.24 | <i>PER1, CRY1, CRY2, CLOCK, ARNTL, CSNK1E</i> |
| Yang CH   | 2015 | Case control | Taiwanese | 36  | 21 | 15 | 50.94 ± 18.62 | <i>TLR2, TLR3, TLR4, TLR7, TLR8, TLR9</i>     |
| Yazdani N | 2018 | Case control | Iranian   | 77  | 45 | 32 | 43.5 ± 14.7   | <i>NOS3, VDR</i>                              |
| Yazdani N | 2015 | Case control | Iranian   | 77  | 45 | 32 | 43.5 ± 14.7   | <i>MIF</i>                                    |
| Yeo SW    | 2001 | Case control | Korean    | 41  | 24 | 17 | 49.2          | <i>HLA-DRB1, HLA-DQB1, HLA-DQA1, HLA-DPB1</i> |
| Yeo SW    | 2000 | Case control | Korean    | 35  | 22 | 13 | 52.7          | <i>HLA-DRB1</i>                               |
| Yildiz Z  | 2008 | Case control | Turkish   | 53  | 30 | 23 | 4 - 63        | <i>F2, F5, MTHFR, SERPINE1</i>                |
| Zhu WY    | 2019 | Case control | Chinese   | 120 | 69 | 51 | 57            | <i>MIF</i>                                    |
| Zou J     | 2016 | Case report  | Chinese   | 1   | 1  | 0  | 45            | <i>PIK3CD</i>                                 |

1. Amor-Dorado JC, Paco L, Martin J, Lopez-Nevot MA, Gonzalez-Gay MA. Human leukocyte antigen-DQB1 and -DRB1 associations in patients with idiopathic sudden sensorineural hearing loss from a defined population of Northwest Spain. *Acta Otolaryngol.* 2005;125(12):1277-1282. doi:10.1080/00016480510012228
2. Ballesteros F, Tassies D, Reverter JC, Alobid I, Bernal-Sprekelsen M. Idiopathic sudden sensorineural hearing loss: classic cardiovascular and new genetic risk factors. *Audiol Neurootol.* 2012;17(6):400-408. doi:10.1159/000341989

3. Ballesteros F, Alobid I, Tassies D, et al. Is there an overlap between sudden neurosensorial hearing loss and cardiovascular risk factors?. *Audiol Neurootol*. 2009;14(3):139-145. doi:10.1159/000171475
4. Braverman I, Ben David J, Shupak A. MTHFR polymorphism: associated intralabyrinthine hemorrhage. *Otolaryngol Head Neck Surg*. 2009;141(4):541-542. doi:10.1016/j.otohns.2009.02.026
5. Cadoni G, Scipione S, Rocca B, et al. Lack of association between inherited thrombophilic risk factors and idiopathic sudden sensorineural hearing loss in Italian patients. *Ann Otol Rhinol Laryngol*. 2006;115(3):195-200. doi:10.1177/000348940611500307
6. Cadoni G, Gaetani E, Picciotti PM, et al. A case-control study on proinflammatory genetic polymorphisms on sudden sensorineural hearing loss. *Laryngoscope*. 2015;125(1):E28-E32. doi:10.1002/lary.24743
7. Cadoni G, Boccia S, Scipione S, et al. Glutathione s-transferase gene polymorphisms in Italian patients with sudden sensorineural hearing loss. *Otol Neurotol*. 2006;27(8):1166-1169. doi:10.1097/01.mao.0000226303.59198.ce
8. Capaccio P, Cuccarini V, Ottaviani F, Fracchiolla NS, Bossi A, Pignataro L. Prothrombotic gene mutations in patients with sudden sensorineural hearing loss and cardiovascular thrombotic disease. *Ann Otol Rhinol Laryngol*. 2009;118(3):205-210. doi:10.1177/000348940911800308
9. Capaccio P, Ottaviani F, Cuccarini V, et al. Methylenetetrahydrofolate reductase gene mutations as risk factors for sudden hearing loss. *Am J Otolaryngol*. 2005;26(6):383-387. doi:10.1016/j.amjoto.2005.05.001
10. Capaccio P, Ottaviani F, Cuccarini V, et al. Sudden hearing loss and MTHFR 677C>T/1298A>C gene polymorphisms. *Genet Med*. 2005;7(3):206-208. doi:10.1097/01.gim.0000157817.92509.45
11. Capaccio P, Ottaviani F, Cuccarini V, et al. Genetic and acquired prothrombotic risk factors and sudden hearing loss. *Laryngoscope*. 2007;117(3):547-551. doi:10.1097/MLG.0b013e31802f3c6a
12. Castiglione A, Ciorba A, Aimoni C, et al. Sudden sensorineural hearing loss and polymorphisms in iron homeostasis genes: new insights from a case-control study. *Biomed Res Int*. 2015;2015:834736. doi:10.1155/2015/834736
13. Castiglione A, Ciorba A, Aimoni C, et al. Sudden sensorineural hearing loss and polymorphisms in iron homeostasis genes: new insights from a case-control study. *Biomed Res Int*. 2015;2015:834736. doi:10.1155/2015/834736
14. Chien CY, Huang TY, Tai SY, et al. Glutathione peroxidase 3 gene polymorphisms and the risk of sudden sensorineural hearing loss. *Kaohsiung J Med Sci*. 2017;33(7):359-364. doi:10.1016/j.kjms.2017.04.003
15. Chien CY, Tai SY, Wang LF, et al. Phosphodiesterase 4D gene polymorphisms in sudden sensorineural hearing loss. *Eur Arch Otorhinolaryngol*. 2016;273(9):2403-2409. doi:10.1007/s00405-015-3804-5
16. Chien CY, Chang NC, Tai SY, Wang LF, Wu MT, Ho KY. Heat shock protein 70 gene polymorphisms in sudden sensorineural hearing loss. *Audiol Neurootol*. 2012;17(6):381-385. doi:10.1159/000341815
17. Cho SH, Chen H, Kim IS, et al. Association of the 4 g/5 g polymorphism of plasminogen activator inhibitor-1 gene with sudden sensorineural hearing loss. A case control study. *BMC Ear Nose Throat Disord*. 2012;12:5. Published 2012 Jun 6. doi:10.1186/1472-6815-12-5
18. Fatini C, Mannini L, Sticchi E, et al. eNOS gene affects red cell deformability: role of T-786C, G894T, and 4a/4b polymorphisms. *Clin Appl Thromb Hemost*. 2005;11(4):481-488. doi:10.1177/107602960501100417
19. Furuta T, Teranishi M, Uchida Y, et al. Association of interleukin-1 gene polymorphisms with sudden sensorineural hearing loss and Ménière's disease. *Int J Immunogenet*. 2011;38(3):249-254. doi:10.1111/j.1744-313X.2011.01004.x

20. Fusconi M, Chistolini A, Angelosanto N, et al. Role of genetic and acquired prothrombotic risk factors in genesis of sudden sensorineural hearing loss. *Audiol Neurootol*. 2011;16(3):185-190. doi:10.1159/000319310
21. Görür K, Tuncer U, Eskandari G, Ozcan C, Unal M, Ozsahinoglu C. The role of factor V Leiden and prothrombin G20210A mutations in sudden sensorineural hearing loss. *Otol Neurotol*. 2005;26(4):599-601. doi:10.1097/01.mao.0000178120.46290.6c
22. Gross M, Friedman G, Eliashar R, et al. Impact of methionine synthase gene and methylenetetrahydrofolate reductase gene polymorphisms on the risk of sudden sensorineural hearing loss. *Audiol Neurootol*. 2006;11(5):287-293. doi:10.1159/000093957
23. Hamidi AK, Yazdani N, Seyedjavadi KH, et al. MTHFR AND ApoE genetic variants association with sudden sensorineural hearing loss. *Am J Otolaryngol*. 2019;40(2):260-264. doi:10.1016/j.amjoto.2018.10.015
24. Hiramatsu M, Teranishi M, Uchida Y, et al. Polymorphisms in genes involved in inflammatory pathways in patients with sudden sensorineural hearing loss. *J Neurogenet*. 2012;26(3-4):387-396. doi:10.3109/01677063.2011.652266
25. Kitoh R, Nishio SY, Ogawa K, et al. SOD1 gene polymorphisms in sudden sensorineural hearing loss. *Acta Otolaryngol*. 2016;136(5):465-469. doi:10.3109/00016489.2015.1116047
26. Kitoh R, Nishio SY, Usami SI. Prognostic impact of gene polymorphisms in patients with idiopathic sudden sensorineural hearing loss. *Acta Otolaryngol*. 2017;137(sup565):S24-S29. doi:10.1080/00016489.2017.1296971
27. Koide Y, Teranishi M, Sugiura S, et al. Association between Uncoupling Protein 2 Gene Ala55val Polymorphism and Sudden Sensorineural Hearing Loss. *J Int Adv Otol*. 2018;14(2):166-169. doi:10.5152/iao.2018.5442
28. Kokotas H, Theodosiou M, Korres G, et al. Sudden hearing loss in a family with GJB2 related progressive deafness. *Int J Pediatr Otorhinolaryngol*. 2008;72(11):1735-1740. doi:10.1016/j.ijporl.2008.08.006
29. Lan MY, Shiao JY, Hsu YB, Lin FY, Lin JC. A preliminary study on the role of inherited prothrombotic risk factors in Taiwanese patients with sudden sensorineural hearing loss. *Eur Arch Otorhinolaryngol*. 2011;268(6):817-822. doi:10.1007/s00405-010-1457-y
30. Lee EJ, Cho YJ, Yoon YJ. Methylenetetrahydrofolate reductase C677T gene mutation as risk factor for sudden sensorineural hearing loss: association with plasma homocysteine, folate and cholesterol concentrations. *J Laryngol Otol*. 2010;124(12):1268-1273. doi:10.1017/S002221511000099X
31. Lin X, Teng Y, Lan J, He B, Sun H, Xu F. GRHL2 genetic polymorphisms may confer a protective effect against sudden sensorineural hearing loss. *Mol Med Rep*. 2016;13(3):2857-2863. doi:10.3892/mmr.2016.4871
32. Liu H, Gu Z, Kang HY, et al. FCRL3 gene polymorphisms confer risk for sudden sensorineural hearing loss in a Chinese Han Population. *Gene*. 2015;570(1):89-94. doi:10.1016/j.gene.2015.06.005
33. Marcucci R, Alessandrello Liotta A, Cellai AP, et al. Cardiovascular and thrombophilic risk factors for idiopathic sudden sensorineural hearing loss. *J Thromb Haemost*. 2005;3(5):929-934. doi:10.1111/j.1538-7836.2005.01310.x
34. Mosnier I, Stepanian A, Baron G, et al. Cardiovascular and thromboembolic risk factors in idiopathic sudden sensorineural hearing loss: a case-control study. *Audiol Neurootol*. 2011;16(1):55-66. doi:10.1159/000312640
35. Nam SI, Yu GI, Kim HJ, et al. A polymorphism at -1607 2G in the matrix metalloproteinase-1 (MMP-1) increased risk of sudden deafness in Korean population but not at -519A/G in MMP-1. *Laryngoscope*. 2011;121(1):171-175. doi:10.1002/lary.21334
36. Nam SI, Ha E, Jung KH, et al. IL4 receptor polymorphism is associated with increased risk of sudden deafness in Korean population. *Life Sci*. 2006;78(6):664-667. doi:10.1016/j.lfs.2005.05.089

37. Nishio N, Teranishi M, Uchida Y, et al. Polymorphisms in genes encoding aquaporins 4 and 5 and estrogen receptor  $\alpha$  in patients with Ménière's disease and sudden sensorineural hearing loss. *Life Sci.* 2013;92(10):541-546. doi:10.1016/j.lfs.2013.01.019
38. Nishio N, Teranishi M, Uchida Y, et al. Contribution of complement factor H Y402H polymorphism to sudden sensorineural hearing loss risk and possible interaction with diabetes. *Gene.* 2012;499(1):226-230. doi:10.1016/j.gene.2012.02.027
39. Patscheke JH, Arndt J, Dietz K, Zenner HP, Reuner KH. The prothrombin G20210A mutation is a risk factor for sudden hearing loss in young patients. *Thromb Haemost.* 2001;86(4):1118-1119.
40. Rudack C, Langer C, Stoll W, Rust S, Walter M. Vascular risk factors in sudden hearing loss. *Thromb Haemost.* 2006;95(3):454-461. doi:10.1160/TH05-08-0554
41. Rudack C, Langer C, Junker R. Platelet GPIaC807T polymorphism is associated with negative outcome of sudden hearing loss. *Hear Res.* 2004 May;191(1-2):41-8. doi: 10.1016/j.heares.2004.01.002. PMID: 15109703.
42. Şeker Yıldız K, Durmuş K, Dönmez G, Arslan S, Altuntaş EE. Studying the Association between Sudden Hearing Loss and DNA N-Methyltransferase 1 (DNMT1) Genetic Polymorphism. *J Int Adv Otol.* 2017;13(3):313-317. doi:10.5152/iao.2017.2723
43. Teranishi M, Uchida Y, Nishio N, et al. Polymorphisms in genes involved in the free-radical process in patients with sudden sensorineural hearing loss and Ménière's disease. *Free Radic Res.* 2013;47(6-7):498-506. doi:10.3109/10715762.2013.793319
44. Teranishi M, Uchida Y, Nishio N, et al. Polymorphisms in genes involved in oxidative stress response in patients with sudden sensorineural hearing loss and Ménière's disease in a Japanese population. *DNA Cell Biol.* 2012;31(10):1555-1562. doi:10.1089/dna.2012.1631
45. Tian G, Zhang S, Yang J. Coexistence of IL-6 -572C/G and ICAM-1 K469E Polymorphisms among Patients with Sudden Sensorineural Hearing Loss. *Tohoku J Exp Med.* 2018;245(1):7-12. doi:10.1620/tjem.245.7
46. Tripodi A, Capaccio P, Pignataro L, et al. Thrombin generation in patients with idiopathic sudden sensorineural hearing loss. *Thromb Res.* 2014;133(6):1130-1134. doi:10.1016/j.thromres.2014.03.031
47. Uchida Y, Sugiura S, Ando F, Shimokata H, Nakashima T. Association of the C677T polymorphism in the methylenetetrahydrofolate reductase gene with sudden sensorineural hearing loss. *Laryngoscope.* 2010;120(4):791-795. doi:10.1002/lary.20809
48. Uchida Y, Teranishi M, Nishio N, et al. Endothelin-1 gene polymorphism in sudden sensorineural hearing loss. *Laryngoscope.* 2013;123(11):E59-E65. doi:10.1002/lary.24298
49. Uchida Y, Sugiura S, Nakashima T, Ando F, Shimokata H. Contribution of 1425G/A polymorphism in protein kinase C-Eta (PRKCH) gene and brain white matter lesions to the risk of sudden sensorineural hearing loss in a Japanese nested case-control study. *J Neurogenet.* 2011;25(3):82-87. doi:10.3109/01677063.2011.591462
50. Um JY, Jang CH, Kim KY, et al. Candidate genes of cerebrovascular disease and sudden sensorineural hearing loss. *Clin Appl Thromb Hemost.* 2010;16(5):559-562. doi:10.1177/1076029609348313
51. Um JY, Jang CH, Kim HL, et al. Proinflammatory cytokine IL-1  $\beta$  polymorphisms in sudden sensorineural hearing loss. *Immunopharmacol Immunotoxicol.* 2013;35(1):52-56. doi:10.3109/08923973.2012.719523
52. Um JY, Jang CH, Kim SJ, et al. Steroid combination therapy and detoxification enzyme gene polymorphisms in sudden sensorineural hearing loss patients. *Otol Neurotol.* 2011;32(5):872-876. doi:10.1097/MAO.0b013e31821341ac
53. Varga L, Jovankovicova A, Huckova M, et al. Hereditary bilateral sudden sensorineural hearing loss. *Bratisl Lek Listy.* 2019;120(9):699-702. doi:10.4149/BLL\_2019\_118

54. Weiss D, Neuner B, Gorzelniak K, Bremer A, Rudack C, Walter M. Platelet glycoproteins and fibrinogen in recovery from idiopathic sudden hearing loss. *PLoS One*. 2014;9(1):e86898. Published 2014 Jan 23. doi:10.1371/journal.pone.0086898
55. Yang CH, Hwang CF, Lin PM, et al. Sleep Disturbance and Altered Expression of Circadian Clock Genes in Patients With Sudden Sensorineural Hearing Loss. *Medicine (Baltimore)*. 2015;94(26):e978. doi:10.1097/MD.0000000000000978
56. Yang CH, Hwang CF, Yang MY, Lin PM, Chuang JH. Expression of toll-like receptor genes in leukocytes of patients with sudden sensorineural hearing loss. *Laryngoscope*. 2015;125(12):E382-E387. doi:10.1002/lary.25241
57. Yazdani N, Kakavand Hamidi A, Soroush N, et al. eNOS gene Glu298Asp variant confer risk in sudden sensorineural hearing loss. *Acta Otolaryngol*. 2018;138(10):904-908. doi:10.1080/00016489.2018.1497806
58. Yazdani N, Kakavand Hamidi A, Ghazavi H, et al. Association between Macrophage Migration Inhibitory Factor Gene Variation and Response to Glucocorticoid Treatment in Sudden Sensorineural Hearing Loss. *Audiol Neurootol*. 2015;20(6):376-382. doi:10.1159/000438741
59. Yeo SW, Park SN, Park YS, et al. Different distribution of HLA class II alleles according to response to corticosteroid therapy in sudden sensorineural hearing loss. *Arch Otolaryngol Head Neck Surg*. 2001;127(8):945-949. doi:10.1001/archotol.127.8.945
60. Yeo SW, Chang KH, Suh BD, Kim TG, Han H. Distribution of HLA-A, -B and -DRB1 alleles in patients with sudden sensorineural hearing loss. *Acta Otolaryngol*. 2000;120(6):710-715. doi:10.1080/000164800750000225
61. Yildiz Z, Ulu A, Incesulu A, Ozkaptan Y, Akar N. The importance of thrombotic risk factors in the development of idiopathic sudden hearing loss. *Clin Appl Thromb Hemost*. 2008;14(3):356-359. doi:10.1177/1076029607306399
62. Zhu WY, Jin X, Ma YC, Liu ZB. Correlations of *MIF* polymorphism and serum levels of MIF with glucocorticoid sensitivity of sudden sensorineural hearing loss. *J Int Med Res*. 2020;48(4):300060519893870. doi:10.1177/0300060519893870
63. Zou J, Duan X, Zheng G, et al. A novel PIK3CD C896T mutation detected in bilateral sudden sensorineural hearing loss using next generation sequencing: An indication of primary immunodeficiency. *J Otol*. 2016;11(2):78-83. doi:10.1016/j.joto.2016.06.001
