# Supplementary material
Source: PubMed Central journal article supplement (PMC8595752)
Supplement: NIHMS1734619-supplement-Supplemental_Digital_Content_6.pdf [file NIHMS1734619-supplement-Supplemental_Digital_Content_6.pdf]

# Supplemental Digital Content, Figure 1A-D. Differential Expression of Glutathione Peroxidase Isoforms Amongst Cochlear Cell Types

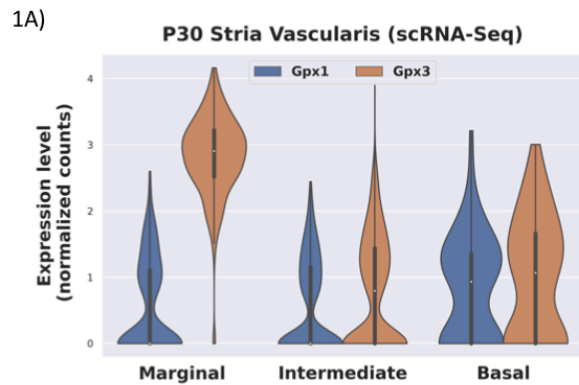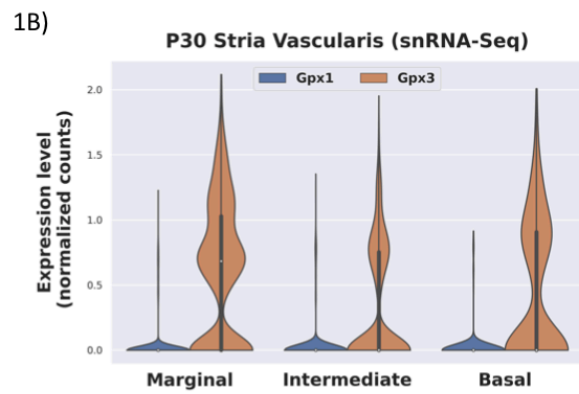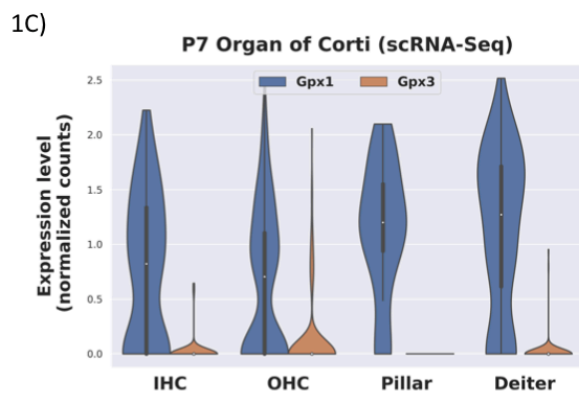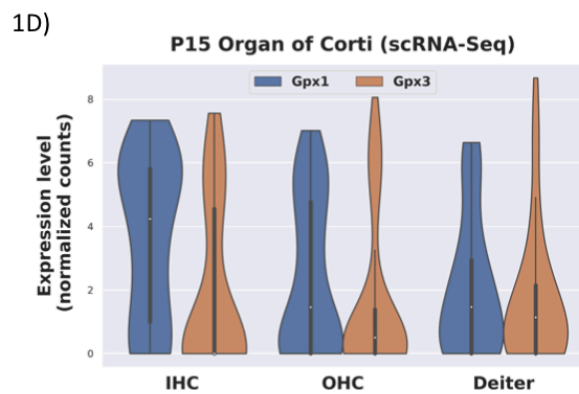

**Suppl. Digital Content 6, Figure 1. Differential expression of glutathione peroxidase isoforms amongst cochlear cell types.** Violin plots display cell types along the horizontal axis with expression level in normalized counts along the vertical axis. Expression of glutathione peroxidase isoforms are shown for *Gpx1* (dark blue) and *Gpx3* (orange). The wider the violin plot, the more cells express the given isoform at the given expression level. **A**, Expression of glutathione peroxidase isoforms in P30 stria vascularis cell types from the scRNA-Seq dataset. Note the increased expression of *Gpx3* in marginal cells. **B**, Expression of glutathione peroxidase isoforms in the P30 stria vascularis from the snRNA-Seq dataset. Note the relative enrichment of *Gpx3* over *Gpx1* amongst cell types in the stria vascularis. **C**, Expression of glutathione peroxidase isoforms in the P7 organ of Corti scRNA-Seq dataset. Note the relative enrichment of *Gpx1* over *Gpx3*. **D**, Expression of glutathione peroxidase isoforms in the P15 organ of Corti scRNA-Seq dataset. Note the relative enrichment of *Gpx1* over *Gpx3*.

#### **Methods:**

**Visualization of P25-27 mouse spiral ganglion neuron scRNA-Seq.** Previously published normalized datasets detailed in the methods section were processed using Scanpy (v1.5.1). Cell clustering and annotation was performed using modularity-based clustering with Leiden algorithm (resolution=2.0) implemented in Scanpy. Violin plots were plotted by Seaborn (v0.10.1).
