# Supplementary material
Source: PubMed Central journal article supplement (PMC8595752)
Supplement: NIHMS1734619-supplement-Supplemental_Digital_Content_7.pdf [file NIHMS1734619-supplement-Supplemental_Digital_Content_7.pdf]

## Spiral Ganglion Neurons

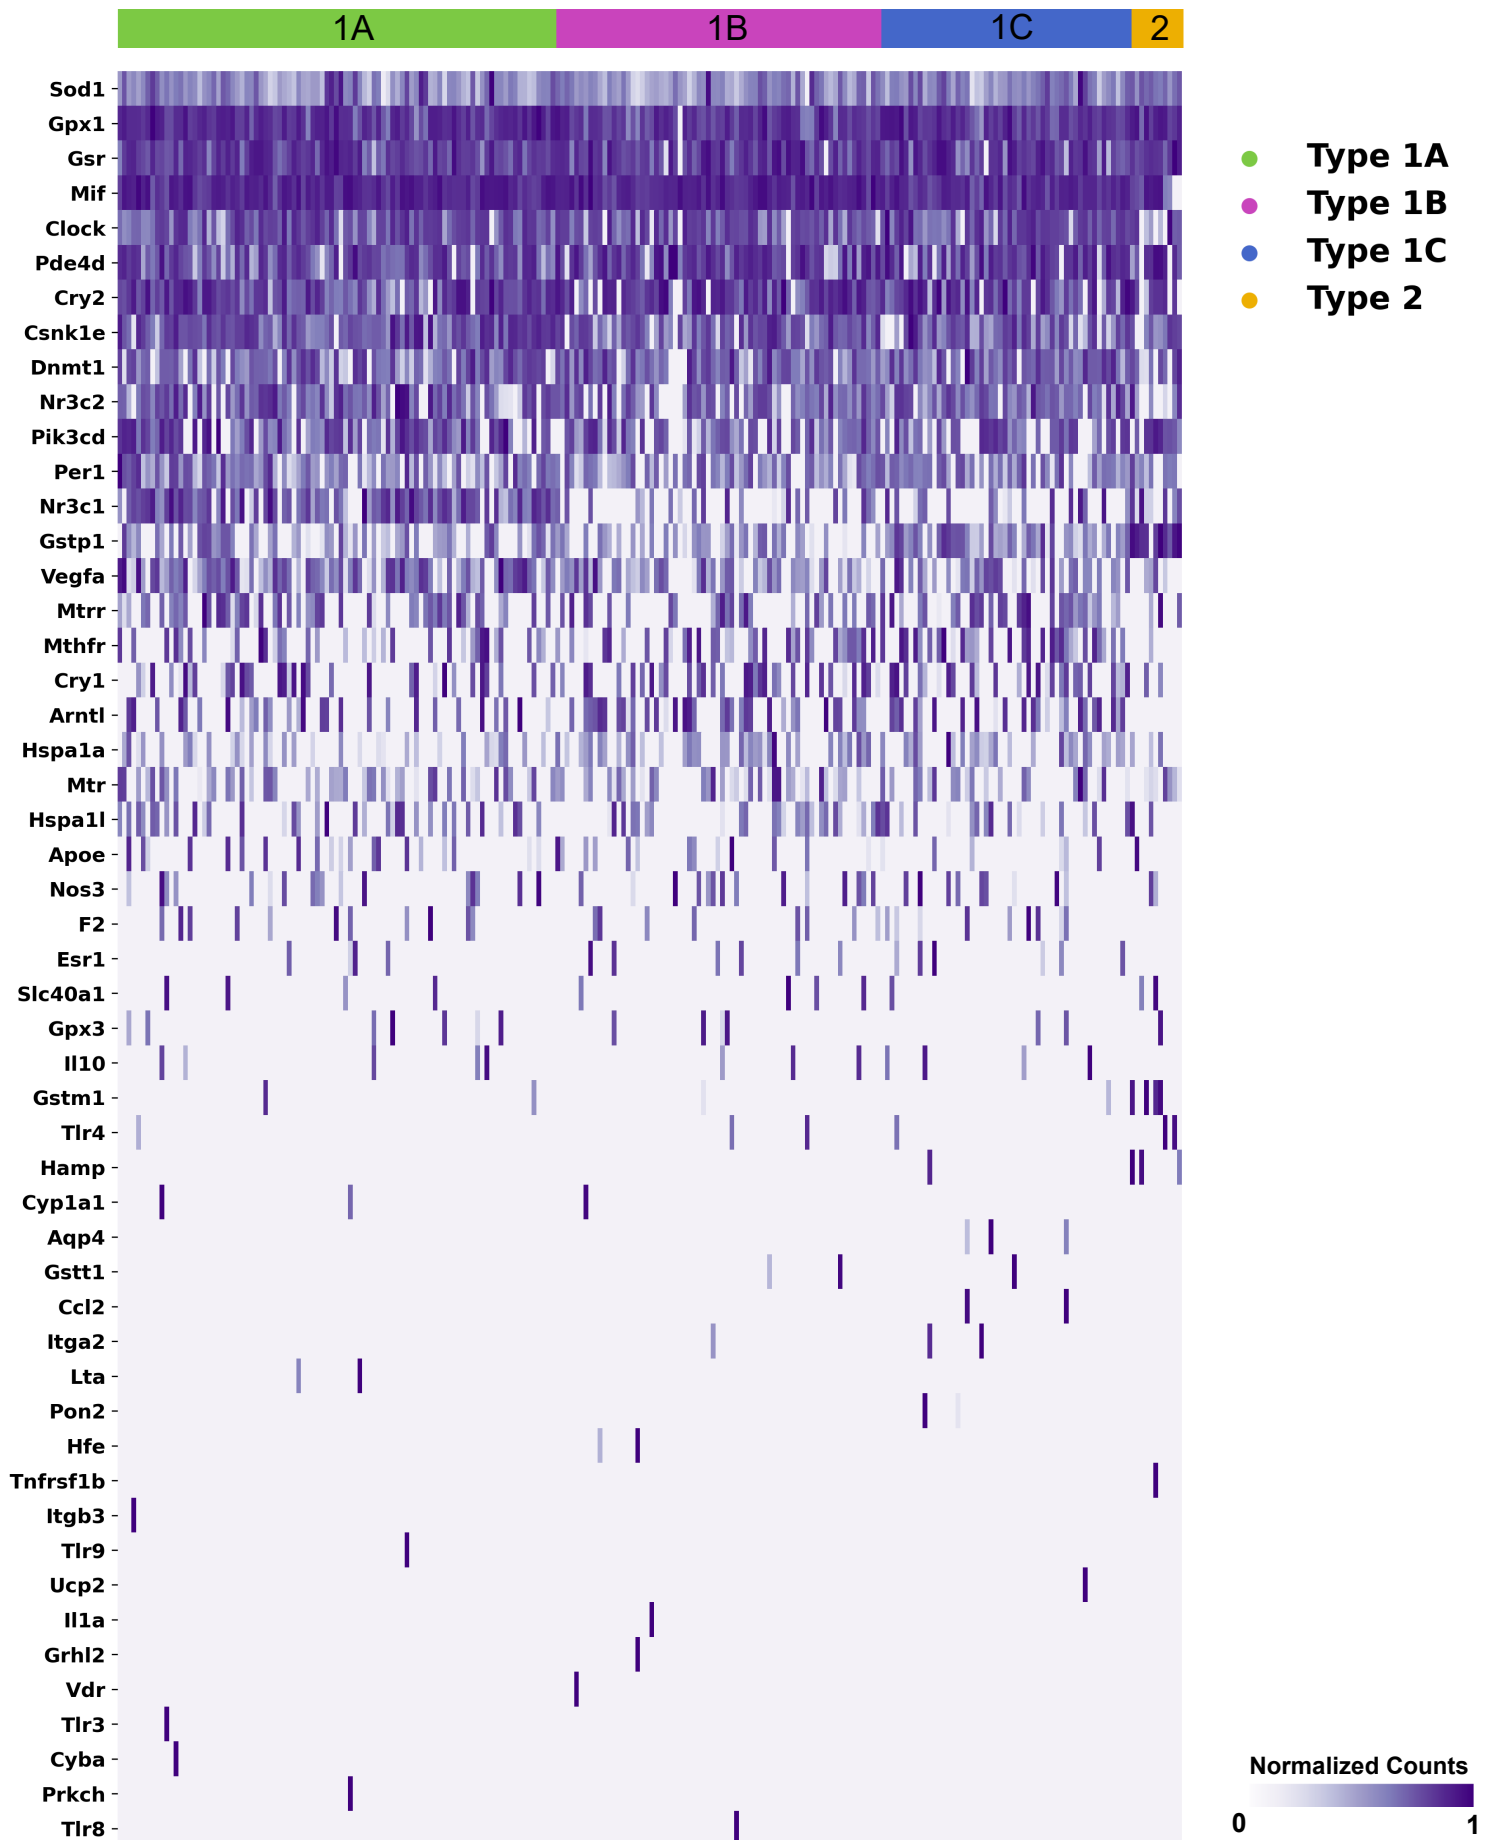

**Suppl. Digital Content 7, Figure 2. Expression of SSNHL-investigated genes in the adult mouse spiral ganglion (SGN) utilizing a single cell RNA-Seq P25-27 mouse SGN dataset (Shrestha et al., 2018).** Heatmap displays cells along the horizontal axis with cell types grouped by color and SSNHL-investigated genes along the vertical axis. The darker the bar the more highly expressed the gene is in a given cell. Cell types include type 1 SGNs (1A in green, 1B in magenta, 1C in blue) as well as type 2 SGNs (yellow).

### **Methods:**

**Data availability.** A published single cell RNA-Seq dataset from the P25-27 adult mouse spiral ganglion neurons (SGN) including Type 1A, 1B, and 1C SGN as well as Type 2 SGN (Shrestha et al., 2018) was utilized (GEO Accession ID: GSE114997) and are available at the following link for visualization (<https://screen.hms.harvard.edu/harvard/>) as well as the gEAR Portal ([https://umgear.org//index.html?layout\\_id=fee360e8](https://umgear.org//index.html?layout_id=fee360e8)).

**Visualization of P25-27 mouse spiral ganglion neuron scRNA-Seq.** Previously published normalized dataset from P25-27 mouse spiral ganglion neuron single cell RNA-Seq dataset from Shrestha and colleagues (Shrestha et al., 2018) was processed using Scanpy (v1.5.1). Cell clustering and annotation was performed using modularity-based clustering with Leiden algorithm (resolution=2.0) implemented in Scanpy. Normalized counts were scaled by min-max scaling before plotting. Heatmaps were plotted by Seaborn (v0.10.1).
