# Supplementary material
Source: PubMed Central journal article supplement (PMC8595752)
Supplement: NIHMS1734619-supplement-Supplemental_Digital_Content_8.pdf [file NIHMS1734619-supplement-Supplemental_Digital_Content_8.pdf]

Suppl. Digital Content, Figure 3. SSNHL genes expressed in human cochlea bulk RNA-Seq

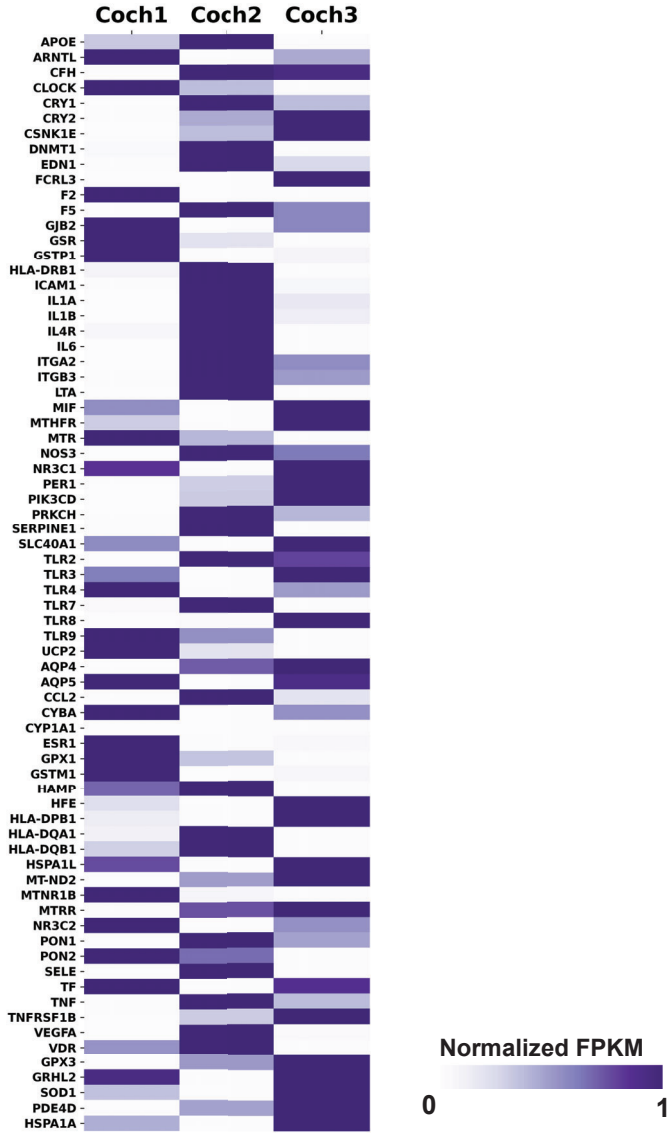

**Suppl. Digital Content 8, Figure 3. Expression of SSNHL-investigated genes in the adult human cochlea utilizing bulk RNA-Seq from human cochlea specimens obtained during vestibular schwannoma surgery (Schrauwen et al., 2016).**

Heatmap displays 3 human cochlea samples along the horizontal axis and SSNHL-investigated genes along the vertical axis. The darker the bar the more highly expressed the gene is in a given cell. One caveat to these data is that while bulk RNA-Seq may identify highly expressed genes, cell type-specific gene expression may be missed in bulk RNA-Seq datasets as compared to single-cell RNA-Seq datasets.

**Methods:**

**Data availability.** Published bulk human cochlea RNA-Seq dataset obtained from patients undergoing surgery for vestibular schwannoma was utilized (Schrauwen et al., 2016) and are available at the following link for download

(<https://www.tgen.org/home/research/research-divisions/neurogenomics/supplementary-data/inner-ear-transcriptome.aspx>).

**Visualization of Human cochlea bulk RNA-Seq.** Raw FPKM data were downloaded as described above (file name: HumanEar\_FPKM\_gene\_RNASTAR.xlsx). Gene ensemble id's were converted to gene symbols based on human genome reference (GRCh38.p13). FPKM values were scaled by min-max scaling before plotting. Heatmap was plotted by Seaborn (v0.10.1).
